# Supplementary material for: MCD Diet Rat Model Induces Alterations in Zinc and Iron during NAFLD Progression from Steatosis to Steatohepatitis
Source: MDPI journal article supplement (doi:10.3390/ijms23126817), 2022-06-19
Supplement: s1 [file s1]

**Figure S1: Representative Western blots of TIMPs and RECK**

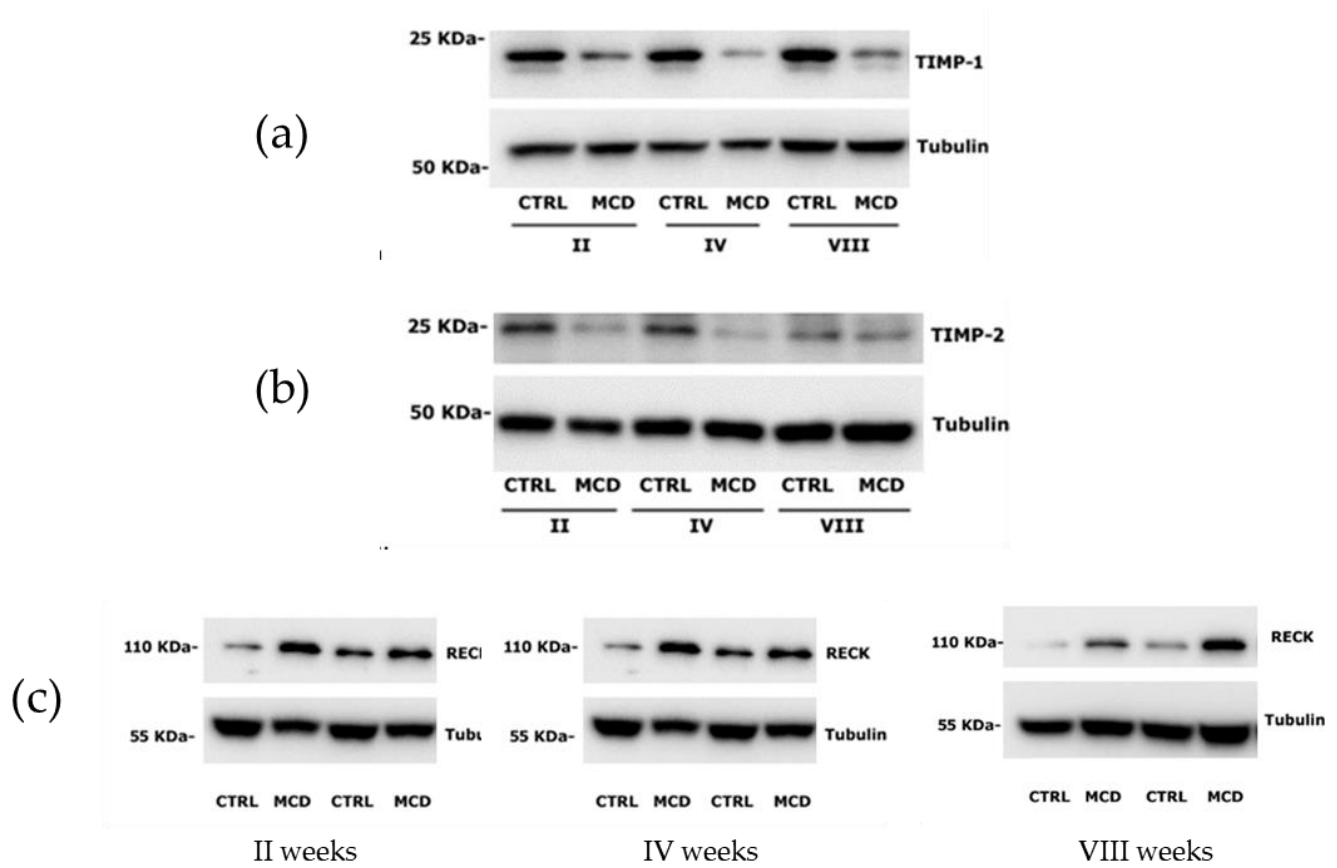

**Figure S1.** Representative Western blots of TIMP-1 (panel a), TIMP-2 (panel b) and RECK (panel c) determined in livers obtained from rats fed with Control or MCD diet 2, 4 and 8 weeks.
